# Supplementary material
Source: Elsevier journal article supplement (https://www.sciencedirect.com/science/article/pii/S2173572719301845)

## SUPPLEMENTARY MATERIAL

**Supplementary Table 1:** Demographic data, clinical characteristics and leukocyte subpopulation at HAS diagnosis. Differences between survivors and non survivors

|                                                                 | <b>n=196</b>     | <b>Survivors = 107</b> | <b>Nonsurvivors = 89</b> | <b>p</b> |
|-----------------------------------------------------------------|------------------|------------------------|--------------------------|----------|
| <b>Demographic data</b>                                         |                  |                        |                          |          |
| Age (Years)                                                     | 73.0 [68.1-71.4] | 70.0 [65.9-70.5]       | 75.0 [69.4-74.0]         | 0.032    |
| Sex (male)                                                      | 134 (68.4)       | 67 (62.6)              | 67 (75.3)                | NS       |
| <b>Comorbidities</b>                                            |                  |                        |                          |          |
| Arterial hypertension                                           | 120 (61.2)       | 67 (62.6)              | 53 (59.6)                | NS       |
| Cardiac disease                                                 | 125 (63.8)       | 70 (65.4)              | 55 (61.8)                | NS       |
| Vascular disease                                                | 53 (27.0)        | 21 (19.6)              | 32 (36.0)                | 0.010    |
| Cerebro-vascular disease                                        | 23 (11.7)        | 13 (12.1)              | 10 (11.2)                | NS       |
| Dyslipemia                                                      | 113 (57.7)       | 63 (58.9)              | 50 (56.2)                | NS       |
| Cancer                                                          | 67 (34.2)        | 31 (29.0)              | 36 (40.4)                | NS       |
| Diabetes (Type I or II)                                         | 55 (28.1)        | 30 (28.0)              | 25 (28.1)                | NS       |
| Obesity                                                         | 41 (20.9)        | 24 (22.4)              | 17 (19.1)                | NS       |
| Alcohol abuse                                                   | 29 (14.8)        | 13 (12.1)              | 16 (18.0)                | NS       |
| Chronic respiratory disease                                     | 36 (18.4)        | 23 (21.5)              | 13 (14.6)                | NS       |
| Chronic kidney disease                                          | 38 (19.4)        | 15 (14.0)              | 23 (25.8)                | 0.037    |
| Corticoid treatment                                             | 24 (12.2)        | 15 (14.0)              | 9 (10.1)                 | NS       |
| Immunosuppression                                               | 35 (17.9)        | 20 (18.7)              | 15 (16.9)                | NS       |
| Chronic hepatic disease                                         | 12 (6.1)         | 6 (5.6)                | 6 (6.7)                  | NS       |
| Smoking habit                                                   | 90 (45.9)        | 48 (44.9)              | 42 (47.2)                | NS       |
| <b>Source of Infection</b>                                      |                  |                        |                          |          |
| Urinary                                                         | 24 (12.2)        | 14 (13.1)              | 10 (11.2)                | NS       |
| Surgical                                                        | 43 (21.9)        | 21 (19.6)              | 22 (24.7)                | NS       |
| Bacteraemia                                                     | 49 (25.0)        | 34 (31.8)              | 15 (16.9)                | 0.016    |
| Primary bacteraemia                                             | 26 (13.3)        | 19 (17.8)              | 7 (7.9)                  | 0.042    |
| Catheter-related bacteraemia                                    | 23 (11.7)        | 15 (14.0)              | 8 (9.0)                  | NS       |
| Other                                                           | 12 (6.1)         | 5 (4.7)                | 7 (7.9)                  | NS       |
| Unknown                                                         | 11 (5.6)         | 4 (3.7)                | 7 (7.9)                  | NS       |
| <b>Cell counts at HAS diagnosis</b>                             |                  |                        |                          |          |
| Leucocytes (x 10 <sup>3</sup> /mm <sup>3</sup> ), median (IQR)  | 12.9 [8.4-19.3]  | 13.5[9.2-19.1]         | 12.3[7.4-19.9]           | NS       |
| Lymphocytes (x 10 <sup>3</sup> /mm <sup>3</sup> ), median (IQR) | 0.8 [0.4-1.3]    | 0.9 [0.7-1.4]          | 0.7 [0.3-1.2]            | 0.042    |
| Neutrophils (x 10 <sup>3</sup> /mm <sup>3</sup> ), median (IQR) | 10.9 [6.5-17.0]  | 11.3 [7.2-17.0]        | 10.2[6.2 – 17.5]         | NS       |
| Basophils (x 10 <sup>3</sup> /mm <sup>3</sup> ), median (IQR)   | 0.03 [0.02-0.06] | 0.03 [0.02 -0.06]      | 0.03 [0.00 – 0.05]       | NS       |
| Eosinophils (x 10 <sup>3</sup> /mm <sup>3</sup> ), median (IQR) | 0.02 [0.00-0.11] | 0.04 [0.00 - 0.14]     | 0.01 [0.00 - 0.09]       | 0.021    |
| Monocytes (x 10 <sup>3</sup> /mm <sup>3</sup> ), median (IQR)   | 0.6 [0.3-0.9]    | 0.6 [0.3 – 0.9]        | 0.5 [0.2 – 0.8]          | NS       |

HAS, Hospital acquired sepsis; IQR, Interquartile range

**Supplementary Fig. 1:** AUC comparing the ability of absolute lymphocyte count and absolute eosinophil count at HAS diagnosis to predict hospital survival.

The Optimal Operating Point (OOP) was identified as 775 lymphocytes/mm<sup>3</sup> and 13 eosinophils/mm<sup>3</sup>

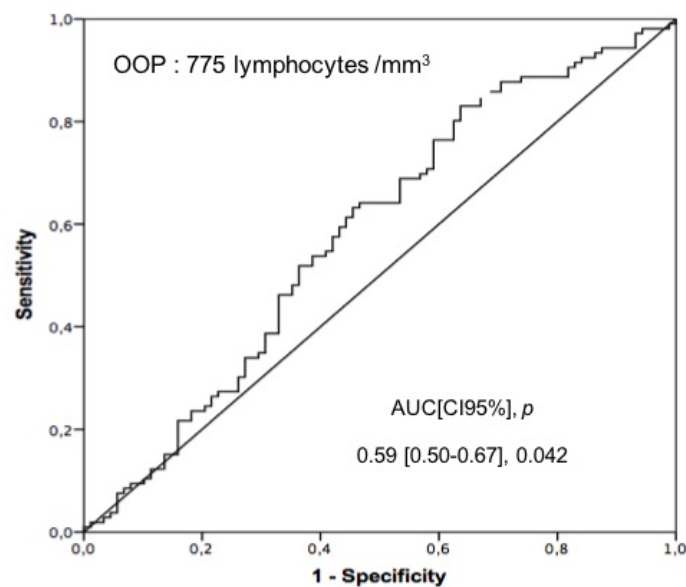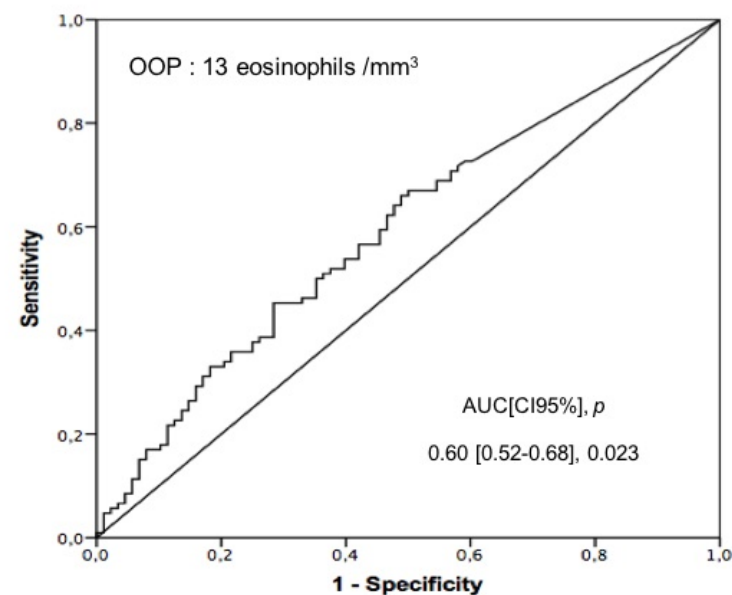

Supplement: mmc1 [file S2173572719301845:mmc1.pdf]
